# Supplementary material for: Burden of injury along the development spectrum: associations between the Socio-demographic Index and disability-adjusted life year estimates from the Global Burden of Disease Study 2017
Source: HighWire-hosted journal article supplement (doi:10.1136/injuryprev-2019-043296), 2020-01-08
Supplement: injuryprev-2019-043296supp003_data_supplement.pdf [file injuryprev-2019-043296supp003_data_supplement.pdf]

**Table 1: Age-standardized mortality and incidence rates in 2017 and percentage change from 1990 to 2017 by cause of injury**

| Cause                                                  | Deaths (95% UI)                         |                                                                   | Incidence (95% UI)                      |                                                                   |
|--------------------------------------------------------|-----------------------------------------|-------------------------------------------------------------------|-----------------------------------------|-------------------------------------------------------------------|
|                                                        | 2017 age-standardised rates per 100,000 | Percentage change in age-standardised rates between 1990 and 2017 | 2017 age-standardised rates per 100,000 | Percentage change in age-standardised rates between 1990 and 2017 |
| <b>All injuries</b>                                    | <b>57.9</b><br>(55.9 to 59.2)           | <b>-31.6%</b><br>(-33.6% to -29.1%)                               | <b>6 763</b><br>(6 412 to 7 118)        | <b>-0.9%</b><br>(-2.3% to 0.6%)                                   |
| <b>Transport injuries</b>                              | <b>17.0</b><br>(16.4 to 17.4)           | <b>-28.6%</b><br>(-33.2% to -24.8%)                               | <b>823</b><br>(732 to 923)              | <b>8.3%</b><br>(4.3% to 12.2%)                                    |
| Road injuries                                          | 15.8<br>(15.2 to 16.3)                  | -29.0%<br>(-33.6% to -25.0%)                                      | 692<br>(605 to 786)                     | 11.3%<br>(6.4% to 15.8%)                                          |
| <i>Pedestrian road injuries</i>                        | 6.2<br>(5.9 to 6.8)                     | -37.1%<br>(-44.2% to -29.9%)                                      | 141<br>(116 to 168)                     | 3.0%<br>(-3.4% to 9.5%)                                           |
| <i>Cyclist road injuries</i>                           | 0.9<br>(0.7 to 1.0)                     | 7.7%<br>(-12.6% to 31.4%)                                         | 152<br>(124 to 187)                     | 24.1%<br>(17.0% to 31.6%)                                         |
| <i>Motorcyclist road injuries</i>                      | 2.9<br>(2.5 to 3.0)                     | -11.1%<br>(-29.5% to 1.3%)                                        | 129<br>(105 to 157)                     | 30.0%<br>(22.2% to 37.4%)                                         |
| <i>Motor vehicle road injuries</i>                     | 5.8<br>(5.4 to 6.0)                     | -30.0%<br>(-36.2% to -23.8%)                                      | 207<br>(173 to 247)                     | -4.9%<br>(-10.5% to 0.9%)                                         |
| <i>Other road injuries</i>                             | 0.1<br>(0.1 to 0.2)                     | -27.9%<br>(-40.5% to 13.3%)                                       | 63<br>(49 to 80)                        | 38.0%<br>(30.5% to 45.4%)                                         |
| Other transport injuries                               | 1.2<br>(1.1 to 1.4)                     | -22.1%<br>(-32.0% to -9.9%)                                       | 131<br>(109 to 158)                     | -5.1%<br>(-8.8% to -1.1%)                                         |
| <b>Unintentional injuries</b>                          | <b>23.8</b><br>(22.4 to 24.7)           | <b>-35.5%</b><br>(-38.1% to -31.3%)                               | <b>5 400</b><br>(5 075 to 5 739)        | <b>-1.4%</b><br>(-3.2% to 0.3%)                                   |
| Falls                                                  | 9.2<br>(8.5 to 9.8)                     | -5.9%<br>(-13.7% to 3.5%)                                         | 2 238<br>(1 990 to 2 532)               | -3.7%<br>(-7.4% to -0.3%)                                         |
| Drowning                                               | 4.0<br>(3.8 to 4.1)                     | -57.4%<br>(-60.1% to -53.3%)                                      | 5<br>(4 to 5)                           | -27.7%<br>(-32.0% to -22.5%)                                      |
| Fire, heat, and hot substances                         | 1.6<br>(1.3 to 1.7)                     | -46.6%<br>(-49.7% to -38.8%)                                      | 119<br>(99 to 142)                      | -5.4%<br>(-11.1% to 0.3%)                                         |
| Poisonings                                             | 0.9<br>(0.7 to 1.0)                     | -37.4%<br>(-56.9% to -20.3%)                                      | 55<br>(44 to 68)                        | 6.0%<br>(0.5% to 11.4%)                                           |
| <i>Poisoning by carbon monoxide</i>                    | 0.5<br>(0.3 to 0.5)                     | -41.2%<br>(-60.8% to -28.9%)                                      | 14<br>(10 to 19)                        | 6.3%<br>(-2.4% to 14.8%)                                          |
| <i>Poisoning by other means</i>                        | 0.5<br>(0.4 to 0.5)                     | -33.5%<br>(-53.2% to -10.5%)                                      | 41<br>(32 to 52)                        | 5.9%<br>(-0.2% to 11.9%)                                          |
| Exposure to mechanical forces                          | 1.8<br>(1.5 to 1.8)                     | -36.2%<br>(-47.8% to -30.5%)                                      | 944<br>(809 to 1 101)                   | -1.7%<br>(-5.5% to 2.0%)                                          |
| <i>Unintentional firearm injuries</i>                  | 0.3<br>(0.3 to 0.3)                     | -46.3%<br>(-51.7% to -37.7%)                                      | 25<br>(18 to 34)                        | -3.6%<br>(-10.2% to 2.9%)                                         |
| <i>Other exposure to mechanical forces</i>             | 1.5<br>(1.2 to 1.6)                     | -33.7%<br>(-48.3% to -27.0%)                                      | 918<br>(788 to 1 073)                   | -1.7%<br>(-5.5% to 2.1%)                                          |
| Adverse effects of medical treatment                   | 1.6<br>(1.4 to 1.8)                     | -25.4%<br>(-30.3% to -16.3%)                                      | 437<br>(376 to 502)                     | 41.9%<br>(34.8% to 49.3%)                                         |
| Animal contact                                         | 1.1<br>(0.6 to 1.2)                     | -35.1%<br>(-43.8% to -19.3%)                                      | 574<br>(492 to 671)                     | -7.1%<br>(-9.7% to -4.3%)                                         |
| <i>Venomous animal contact</i>                         | 0.9<br>(0.5 to 1.1)                     | -34.0%<br>(-44.5% to -16.6%)                                      | 275<br>(225 to 334)                     | -0.6%<br>(-4.4% to 3.4%)                                          |
| <i>Non-venomous animal contact</i>                     | 0.1<br>(0.1 to 0.2)                     | -41.5%<br>(-55.6% to -15.2%)                                      | 299<br>(244 to 363)                     | -12.3%<br>(-14.8% to -9.8%)                                       |
| Foreign body                                           | 1.7<br>(1.6 to 1.8)                     | -34.8%<br>(-39.4% to -30.8%)                                      | 303<br>(262 to 348)                     | -0.4%<br>(-2.2% to 1.5%)                                          |
| <i>Pulmonary aspiration and foreign body in airway</i> | 1.6<br>(1.5 to 1.7)                     | -32.3%<br>(-36.7% to -28.3%)                                      | 18<br>(15 to 22)                        | 9.7%<br>(4.4% to 14.9%)                                           |
| <i>Foreign body in eyes</i>                            | --                                      | --                                                                | 230<br>(191 to 273)                     | -1.8%<br>(-3.9% to 0.4%)                                          |
| <i>Foreign body in other body part</i>                 | 0.1<br>(0.1 to 0.1)                     | -56.9%<br>(-64.3% to -31.6%)                                      | 55<br>(45 to 67)                        | 2.8%<br>(0.3% to 5.4%)                                            |
| Environmental heat and cold exposure                   | 0.7<br>(0.5 to 0.8)                     | -47.3%<br>(-52.9% to -44.1%)                                      | 115<br>(96 to 137)                      | -1.5%<br>(-5.3% to 1.7%)                                          |
| Exposure to forces of nature                           | 0.1<br>(0.1 to 0.1)                     | -86.6%<br>(-88.7% to -84.0%)                                      | 9<br>(8 to 11)                          | -83.1%<br>(-85.0% to -80.7%)                                      |
| Other unintentional injuries                           | 1.2<br>(1.2 to 1.3)                     | -39.8%<br>(-43.3% to -35.0%)                                      | 602<br>(512 to 699)                     | -1.2%<br>(-5.2% to 2.6%)                                          |
| <b>Self-harm and interpersonal violence</b>            | <b>17.1</b><br>(16.3 to 17.5)           | <b>-28.8%</b><br>(-32.2% to -24.9%)                               | <b>540</b><br>(487 to 596)              | <b>-8.0%</b><br>(-10.9% to -4.4%)                                 |
| Self-harm                                              | 10.0<br>(9.4 to 10.3)                   | -35.4%<br>(-39.5% to -30.4%)                                      | 50<br>(42 to 59)                        | -16.3%<br>(-21.4% to -11.5%)                                      |
| <i>Self-harm by firearm</i>                            | 0.8<br>(0.7 to 1.0)                     | -34.6%<br>(-38.2% to -30.4%)                                      | 1<br>(0 to 1)                           | -29.3%<br>(-37.0% to -21.6%)                                      |
| <i>Self-harm by other specified means</i>              | 9.2<br>(8.5 to 9.5)                     | -35.4%<br>(-39.8% to -30.2%)                                      | 50<br>(42 to 58)                        | -16.2%<br>(-21.2% to -11.3%)                                      |
| Interpersonal violence                                 | 5.2<br>(4.7 to 5.5)                     | -22.0%<br>(-24.9% to -18.9%)                                      | 296<br>(253 to 345)                     | -6.5%<br>(-10.6% to -2.4%)                                        |
| <i>Assault by firearm</i>                              | 2.2<br>(1.9 to 2.4)                     | -0.4%<br>(-5.6% to 5.3%)                                          | 7<br>(5 to 9)                           | 7.2%<br>(-0.2% to 15.0%)                                          |
| <i>Assault by sharp object</i>                         | 1.2<br>(0.9 to 1.4)                     | -34.1%<br>(-38.6% to -25.8%)                                      | 55<br>(43 to 70)                        | -8.5%<br>(-14.3% to -2.7%)                                        |
| <i>Assault by other means</i>                          | 1.8<br>(1.6 to 2.1)                     | -32.3%<br>(-39.2% to -25.2%)                                      | 234<br>(200 to 274)                     | -6.4%<br>(-10.5% to -1.9%)                                        |
| Conflict and terrorism                                 | 1.7<br>(1.6 to 1.9)                     | -3.4%<br>(-12.0% to 6.6%)                                         | 167<br>(143 to 202)                     | -14.1%<br>(-19.3% to -5.3%)                                       |

| Cause                          | Deaths (95% UI)                         |                                                                   | Incidence (95% UI)                      |                                                                   |
|--------------------------------|-----------------------------------------|-------------------------------------------------------------------|-----------------------------------------|-------------------------------------------------------------------|
|                                | 2017 age-standardised rates per 100,000 | Percentage change in age-standardised rates between 1990 and 2017 | 2017 age-standardised rates per 100,000 | Percentage change in age-standardised rates between 1990 and 2017 |
| Executions and police conflict | 0.2<br>(0.2 to 0.2)                     | 64.6%<br>(48.2% to 208.1%)                                        | 26<br>(22 to 32)                        | 72.6%<br>(50.4% to 247.9%)                                        |
