# Supplementary material for: Burden of injury along the development spectrum: associations between the Socio-demographic Index and disability-adjusted life year estimates from the Global Burden of Disease Study 2017
Source: HighWire-hosted journal article supplement (doi:10.1136/injuryprev-2019-043296), 2020-01-08
Supplement: injuryprev-2019-043296supp004_data_supplement.pdf [file injuryprev-2019-043296supp004_data_supplement.pdf]

**Table 2: Age-standardized YLL, YLD, and DALY rates in 2017 and percentage change from 1990 to 2017 by cause of injury**

| Cause                                           | YLLs (95% UI)                           |                                                                   | YLDs (95% UI)                           |                                                                   | DALYs (95% UI)                          |                                                                   |
|-------------------------------------------------|-----------------------------------------|-------------------------------------------------------------------|-----------------------------------------|-------------------------------------------------------------------|-----------------------------------------|-------------------------------------------------------------------|
|                                                 | 2017 age-standardised rates per 100,000 | Percentage change in age-standardised rates between 1990 and 2017 | 2017 age-standardised rates per 100,000 | Percentage change in age-standardised rates between 1990 and 2017 | 2017 age-standardised rates per 100,000 | Percentage change in age-standardised rates between 1990 and 2017 |
| <b>All injuries</b>                             | <b>2 548</b><br>(2 462 to 2 610)        | <b>-38.8%</b><br>(-40.9% to -35.9%)                               | <b>719</b><br>(529 to 948)              | <b>-7.8%</b><br>(-9.3% to -6.3%)                                  | <b>3 267</b><br>(3 058 to 3 505)        | <b>-34.0%</b><br>(-36.4% to -31.0%)                               |
| <b>Transport injuries</b>                       | <b>800</b><br>(776 to 823)              | <b>-34.0%</b><br>(-37.9% to -30.1%)                               | <b>167</b><br>(120 to 223)              | <b>-2.9%</b><br>(-4.8% to -0.9%)                                  | <b>968</b><br>(914 to 1 024)            | <b>-30.1%</b><br>(-34.1% to -26.4%)                               |
| Road injuries                                   | 745<br>(718 to 767)                     | -34.4%<br>(-38.5% to -30.4%)                                      | 126<br>(90 to 169)                      | 2.2%<br>(0.3% to 4.0%)                                            | 871<br>(828 to 917)                     | -30.8%<br>(-35.0% to -26.9%)                                      |
| Pedestrian road injuries                        | 270<br>(254 to 301)                     | -44.8%<br>(-51.3% to -37.2%)                                      | 34<br>(24 to 46)                        | -5.4%<br>(-8.0% to -2.9%)                                         | 104<br>(284 to 332)                     | -42.2%<br>(-48.6% to -35.0%)                                      |
| Cyclist road injuries                           | 36<br>(32 to 41)                        | -1.8%<br>(-23.2% to 22.7%)                                        | 21<br>(15 to 29)                        | 12.0%<br>(8.7% to 15.1%)                                          | 57<br>(49 to 66)                        | 2.8%<br>(-12.4% to 18.7%)                                         |
| Motorcyclist road injuries                      | 146<br>(128 to 155)                     | -16.1%<br>(-32.1% to -4.4%)                                       | 32<br>(22 to 43)                        | 17.9%<br>(15.1% to 20.8%)                                         | 178<br>(157 to 192)                     | -11.5%<br>(-26.9% to -1.1%)                                       |
| Motor vehicle road injuries                     | 285<br>(268 to 300)                     | -32.8%<br>(-37.7% to -24.7%)                                      | 32<br>(23 to 43)                        | -11.9%<br>(-17.4% to -10.4%)                                      | 317<br>(298 to 335)                     | -31.1%<br>(-35.8% to -23.6%)                                      |
| Other road injuries                             | 7<br>(6 to 8)                           | -32.7%<br>(-45.6% to 10.7%)                                       | 8<br>(5 to 11)                          | 31.2%<br>(27.7% to 34.2%)                                         | 14<br>(12 to 17)                        | -9.0%<br>(-23.0% to 19.3%)                                        |
| Other transport injuries                        | 55<br>(51 to 65)                        | -27.6%<br>(-36.9% to -14.8%)                                      | 41<br>(29 to 55)                        | -15.7%<br>(-17.7% to -13.4%)                                      | 96<br>(83 to 112)                       | -23.0%<br>(-29.4% to -14.9%)                                      |
| <b>Unintentional injuries</b>                   | <b>929</b><br>(866 to 969)              | <b>-48.4%</b><br>(-51.4% to -43.3%)                               | <b>460</b><br>(333 to 618)              | <b>-9.9%</b><br>(-11.5% to -8.3%)                                 | <b>1 389</b><br>(1 241 to 1 560)        | <b>-39.9%</b><br>(-43.5% to -35.1%)                               |
| Falls                                           | 217<br>(196 to 229)                     | -18.5%<br>(-31.7% to -6.2%)                                       | 243<br>(173 to 330)                     | -9.3%<br>(-10.7% to -7.9%)                                        | 459<br>(387 to 547)                     | -13.9%<br>(-21.2% to -8.0%)                                       |
| Drowning                                        | 228<br>(217 to 240)                     | -63.9%<br>(-66.6% to -59.8%)                                      | 2<br>(1 to 2)                           | -35.7%<br>(-39.0% to -32.3%)                                      | 230<br>(219 to 241)                     | -63.8%<br>(-66.5% to -59.7%)                                      |
| Fire, heat, and hot substances                  | 71<br>(58 to 79)                        | -50.8%<br>(-55.8% to -39.3%)                                      | 40<br>(28 to 55)                        | -24.4%<br>(-29.4% to -19.3%)                                      | 111<br>(93 to 129)                      | -43.7%<br>(-49.3% to -34.1%)                                      |
| Poisonings                                      | 44<br>(33 to 49)                        | -44.4%<br>(-61.5% to -26.3%)                                      | 6<br>(4 to 8)                           | -8.1%<br>(-9.8% to -6.1%)                                         | 56<br>(39 to 56)                        | -41.6%<br>(-57.9% to -24.5%)                                      |
| Poisoning by carbon monoxide                    | 19<br>(14 to 21)                        | -48.0%<br>(-65.2% to -36.0%)                                      | 1<br>(1 to 1)                           | -0.3%<br>(-3.4% to 2.9%)                                          | 20<br>(15 to 22)                        | -46.8%<br>(-63.8% to -35.1%)                                      |
| Poisoning by other means                        | 25<br>(19 to 28)                        | -41.3%<br>(-58.5% to -16.5%)                                      | 5<br>(3 to 7)                           | -9.4%<br>(-11.6% to -7.2%)                                        | 30<br>(24 to 34)                        | -37.7%<br>(-53.7% to -15.3%)                                      |
| Exposure to mechanical forces                   | 84<br>(72 to 88)                        | -40.9%<br>(-51.5% to -35.5%)                                      | 62<br>(43 to 87)                        | -9.8%<br>(-11.5% to -8.1%)                                        | 146<br>(124 to 173)                     | -30.8%<br>(-38.4% to -25.8%)                                      |
| Unintentional firearm injuries                  | 14<br>(13 to 17)                        | -48.5%<br>(-53.7% to -39.0%)                                      | 4<br>(3 to 5)                           | -9.3%<br>(-10.7% to -8.0%)                                        | 18<br>(17 to 21)                        | -43.1%<br>(-48.2% to -34.5%)                                      |
| Other exposure to mechanical forces             | 70<br>(58 to 74)                        | -29.1%<br>(-52.5% to -32.4%)                                      | 58<br>(40 to 82)                        | -9.8%<br>(-11.6% to -8.1%)                                        | 128<br>(107 to 152)                     | -25.5%<br>(-38.0% to -23.1%)                                      |
| Adverse effects of medical treatment            | 58<br>(48 to 71)                        | -28.7%<br>(-37.2% to -14.6%)                                      | 4<br>(3 to 7)                           | 41.8%<br>(34.7% to 49.2%)                                         | 63<br>(52 to 75)                        | -26.1%<br>(-35.1% to -11.7%)                                      |
| Animal contact                                  | 52<br>(29 to 62)                        | -39.0%<br>(-50.2% to -20.5%)                                      | 14<br>(9 to 19)                         | -16.1%<br>(-17.8% to -14.7%)                                      | 66<br>(42 to 77)                        | -35.3%<br>(-45.5% to -19.8%)                                      |
| Venomous animal contact                         | 46<br>(23 to 55)                        | -38.0%<br>(-51.0% to -18.1%)                                      | 9<br>(6 to 13)                          | -11.3%<br>(-13.0% to -9.5%)                                       | 55<br>(33 to 65)                        | -34.7%<br>(-46.0% to -17.4%)                                      |
| Non-venomous animal contact                     | 7<br>(5 to 10)                          | -44.7%<br>(-61.9% to -13.7%)                                      | 5<br>(3 to 7)                           | -24.4%<br>(-26.8% to -22.4%)                                      | 11<br>(8 to 15)                         | -38.1%<br>(-54.7% to -18.5%)                                      |
| Foreign body                                    | 83<br>(78 to 89)                        | -46.7%<br>(-51.4% to -41.9%)                                      | 12<br>(9 to 16)                         | -10.0%<br>(-12.6% to -7.2%)                                       | 95<br>(88 to 102)                       | -43.8%<br>(-48.3% to -39.0%)                                      |
| Pulmonary aspiration and foreign body in airway | 78<br>(73 to 84)                        | -44.2%<br>(-48.7% to -39.0%)                                      | 2<br>(1 to 3)                           | -9.1%<br>(-14.6% to -3.1%)                                        | 80<br>(75 to 85)                        | -43.6%<br>(-48.2% to -38.5%)                                      |
| Foreign body in eyes                            | --                                      | --                                                                | 3<br>(1 to 4)                           | -7.0%<br>(-10.6% to -4.5%)                                        | 3<br>(1 to 4)                           | -7.0%<br>(-10.6% to -4.5%)                                        |
| Foreign body in other body part                 | 5<br>(4 to 7)                           | -68.6%<br>(-75.3% to -46.8%)                                      | 8<br>(5 to 10)                          | -11.2%<br>(-13.7% to -8.5%)                                       | 13<br>(10 to 15)                        | -49.0%<br>(-57.2% to -29.6%)                                      |
| Environmental heat and cold exposure            | 24<br>(16 to 27)                        | -51.8%<br>(-55.4% to -47.9%)                                      | 19<br>(14 to 26)                        | -12.5%<br>(-15.3% to -9.7%)                                       | 43<br>(32 to 51)                        | -39.7%<br>(-43.7% to -35.7%)                                      |
| Exposure to forces of nature                    | 6<br>(6 to 7)                           | -88.1%<br>(-90.1% to -85.6%)                                      | 9<br>(7 to 12)                          | 176.3%<br>(155.6% to 195.3%)                                      | 16<br>(13 to 19)                        | -72.6%<br>(-78.1% to -65.5%)                                      |
| Other unintentional injuries                    | 61<br>(59 to 64)                        | -44.4%<br>(-48.4% to -39.0%)                                      | 49<br>(34 to 69)                        | -9.0%<br>(-10.6% to -7.5%)                                        | 110<br>(95 to 130)                      | -32.8%<br>(-37.4% to -27.9%)                                      |
| <b>Self-harm and interpersonal violence</b>     | <b>819</b><br>(782 to 843)              | <b>-29.1%</b><br>(-32.3% to -25.5%)                               | <b>91</b><br>(71 to 114)                | <b>-5.5%</b><br>(-8.1% to -2.6%)                                  | <b>910</b><br>(872 to 944)              | <b>-27.3%</b><br>(-30.3% to -23.7%)                               |
| Self-harm                                       | 424<br>(397 to 438)                     | -37.7%<br>(-41.8% to -32.9%)                                      | 5<br>(4 to 7)                           | -26.2%<br>(-28.6% to -23.7%)                                      | 429<br>(402 to 443)                     | -37.6%<br>(-41.7% to -32.8%)                                      |
| Self-harm by firearm                            | 33<br>(28 to 42)                        | -35.0%<br>(-38.6% to -29.8%)                                      | 0<br>(0 to 0)                           | -31.5%<br>(-33.8% to -28.9%)                                      | 34<br>(28 to 42)                        | -35.0%<br>(-38.6% to -29.8%)                                      |
| Self-harm by other specified means              | 390<br>(364 to 405)                     | -37.9%<br>(-42.3% to -32.8%)                                      | 5<br>(4 to 7)                           | -26.1%<br>(-28.6% to -23.6%)                                      | 395<br>(369 to 410)                     | -37.8%<br>(-42.1% to -32.8%)                                      |
| Interpersonal violence                          | 277<br>(248 to 294)                     | -22.6%<br>(-25.7% to -19.0%)                                      | 57<br>(44 to 73)                        | -8.1%<br>(-9.8% to -6.3%)                                         | 334<br>(305 to 361)                     | -20.5%<br>(-23.3% to -17.2%)                                      |
| Assault by firearm                              | 123<br>(104 to 132)                     | 1.0%<br>(-5.0% to 6.5%)                                           | 1<br>(1 to 2)                           | 1.7%<br>(0.2% to 3.0%)                                            | 124<br>(106 to 134)                     | 1.0%<br>(-5.0% to 6.4%)                                           |
| Assault by sharp object                         | 59<br>(48 to 72)                        | -35.4%<br>(-40.0% to -26.6%)                                      | 6<br>(4 to 8)                           | -15.0%<br>(-17.1% to -12.7%)                                      | 65<br>(53 to 79)                        | -34.0%<br>(-38.5% to -25.8%)                                      |
| Sexual violence                                 | --                                      | --                                                                | 27<br>(18 to 40)                        | -1.4%<br>(-3.1% to 0.3%)                                          | 27<br>(18 to 40)                        | -1.4%<br>(-3.1% to 0.3%)                                          |
| Assault by other means                          | 95<br>(83 to 112)                       | -34.4%<br>(-40.2% to -27.5%)                                      | 23<br>(16 to 30)                        | -14.0%<br>(-16.1% to -12.0%)                                      | 117<br>(106 to 134)                     | -31.2%<br>(-36.4% to -24.9%)                                      |
| Conflict and terrorism                          | 107<br>(98 to 119)                      | -3.2%<br>(-12.1% to 7.6%)                                         | 27<br>(18 to 40)                        | 4.8%<br>(-3.4% to 12.7%)                                          | 134<br>(119 to 152)                     | -1.7%<br>(-9.0% to 7.0%)                                          |
| Executions and police conflict                  | 11<br>(11 to 12)                        | 69.2%<br>(51.4% to 222.2%)                                        | 2<br>(1 to 2)                           | 40.1%<br>(26.1% to 69.0%)                                         | 13<br>(13 to 14)                        | 64.7%<br>(48.8% to 191.5%)                                        |
